# Supplementary material for: An essential function for the nuclear receptor RORγt in the generation of fetal lymphoid tissue inducer cells
Source: Springer Nature journal article supplement (doi:10.1038/ni1022), 2003-12-21
Supplement: 41590_2004_BFni1022_MOESM1_ESM.pdf [file 41590_2004_BFni1022_MOESM1_ESM.pdf]

# Supplementary Figure 1

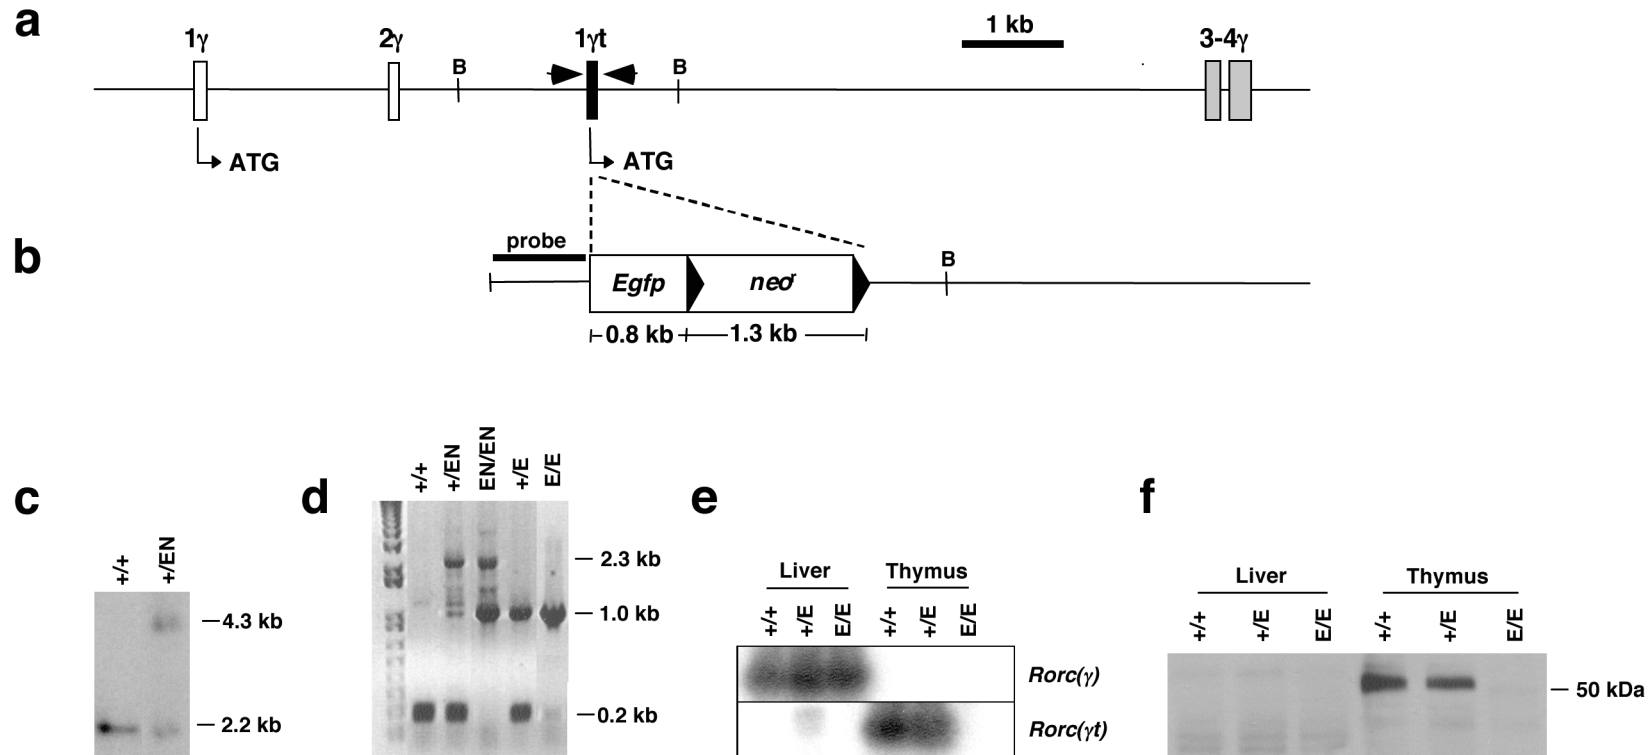

**Supplementary Figure 1** Generation of *Rorc*( $\gamma$ )-EGFP knock-in mice.

(a) The *Rorc* locus on mouse chromosome 3. Only the first four *Rorc* exons are shown. Exons 3 and 4 encode the putative DNA-binding domain of the nuclear receptor. Arrowheads depict the position of the primers used in d. B denotes *Bam*HI sites. (b) Structure of the targeting construct used for homologous recombination in ES cells. Arrowheads show the positions of the loxP sites. (c) Southern blot of ES cell DNA digested with *Bam*HI and detected with the probe depicted in b. Allele nomenclature: EN, intact *Egfp* and *neo*<sup>r</sup> genes; E; *Egfp* without loxP-flanked *neo*<sup>r</sup>. (d) PCR on tail DNA with primers depicted in a. (e) RT-PCR on total RNA from liver and thymus extracts. Isoform-specific primer pairs amplified a 340bp fragment encompassing exons 1 $\gamma$  to 5 $\gamma$  of the *Rorc*( $\gamma$ ) cDNA or the 5' untranslated region to exon 5 $\gamma$  of the *Rorc*( $\gamma$ ) cDNA. PCR products were detected after blotting with a probe generated from the *Rorc*( $\gamma$ ) cDNA. (f) Immunoblot of liver and thymus extracts using a mAb specific for ROR $\gamma$  and ROR $\gamma$ t. An equal amount (50 $\mu$ g) of protein was analyzed from each tissue. The data shown are representative of at least three independent experiments.
